# Supplementary material for: Germline variants in MRE11/RAD50/NBN complex genes in childhood leukemia
Source: PubMed Central journal article supplement (PMC3851537; doi:10.1186/1471-2407-13-457), 2013-10-05
Supplement: 1471-2407-13-457-S1.pdf [file 1471-2407-13-457-S1.pdf]

Additional file 1: Table S1 Sequences of the primers

***MRE11* gene:**

| Exon | Forward 5'→3'             | Reverse 5'→3'              | Length bp |
|------|---------------------------|----------------------------|-----------|
| 5    | TGCAGTTTGCCTATGATTGC      | AAGGCATGCTTTCCACAGAC       | 262       |
| 9    | GAA AGC TTT CGT TTG CAC A | CCT TAC AGG CTT CAT GAG    | 369       |
| 10   | AAGCTGCTATTTCAGCCAAGTT    | CCGATGGTGATTGCTCTTCT       | 275       |
| 14   | ATT GTA GCC CCT TGT TTT A | AGA CCT ATG GAC TGA CTA TT | 231       |
| 15   | CCACTGTGTCAGCCTCCTTT      | TTCCACTCAACTGCCAAGTG       | 395       |
| 19   | GAA AAA CTT AGC CAG AAA G | CAG CAA CTA GCT GGC AGT    | 231       |

***RAD50* gene:**

| Exon | Forward 5'→3'             | Reverse 5'→3'             | Length pz |
|------|---------------------------|---------------------------|-----------|
| 3    | TGCCTTTTTCTCAGAACCAAC     | GAAAACAACCATCAACTTACAGACC | 296 pz    |
| 4    | TAAGCAATAGAATAGATACTG     | TTCAATAACTTAATGGACTACAA   | 295 pz    |
| 5    | GTGACAGCATAATATCCCACTG    | TTGATTTAGCCAGTCCACGA      | 387 pz    |
| 7    | GGTTTGGTTTATATTTGATACCTCA | TCCTTGGAGATTCTTCATTCA     | 324 pz    |

***NBN* gene:**

| Exon | Forward 5'→3'             | Reverse 5'→3'             | Length pz |
|------|---------------------------|---------------------------|-----------|
| 2    | TGTGTATGTGTCTATCAACTTATC  | CAA CCC CCT TAC TGGAAACTA | 228 pz    |
| 5    | TTATGGATGTAAACAGCCTC      | TACCGAACTATAACACAGCA      | 328pz     |
| 6    | CAGATAGTCACTCCGTTTACAA    | ACAACTACTGATAAGAGTTA      | 273pz     |
| 7    | CCAAATCAAATTCTTATGTGTTCAA | CCGGAGCCAAAAAGAAATTA      | 168pz     |
| 7    | CGGGAACGTGTGTTGTTGAT      | GAGCAAGACTCCGTCTCAAAA     | 231pz     |
| 10   | TTCTCTATTAAAGTTGCTGTA     | GATAGTTTGGGATTCTCAT       | 235pz     |
| 10   | AGGAGTCTGCAAAACAAGC       | GACAATACCATTCTACAACAG     | 284pz     |
| 13   | AGATTCCCAAATGACAAGTG      | TTAGCATCACTGGTATCTC       | 299pz     |
